# Supplementary material
Source: publisher site journal article supplement (https://www.dovepress.com/article/324166)
Supplement: Supplementary file 1 [file get_supplementary_file.php]

**Supplementary Table 1**: Data sources.

| Survey items |  |
| --- | --- |
| Patient characteristics | Age, sex, duration of hospital stay, 30-day mortality after admission, in-hospital mortality, transfer by ambulance, administration of antibiotics before admission (except long-term administered agents) |
| Symptoms† | Dyspnea, disordered consciousness, paralysis, weakness, malaise, back or joint pain |
| Past history | Chronic dermatological disorder, diabetes mellitus, malignancy, use of steroid and/or immunosuppressant agents, dentistry going to hospital and/or invasive dental treatment history within 6 months |
| Vital signs†† | Pulse rate, respiratory rate, systemic inflammatory response syndrome, quick-sequential [sepsis-related] organ failure assessment |
| Physical examinations†† | Cardiac murmur, limb edema, dental problem (caries, periodontitis, tooth defect, or poor oral hygiene) |
| Laboratory findings†† | Complete blood test, biochemistry, coagulation system, urinary test |
| Blood culture | Causative bacteria (in the infective endocarditis group) |
| Echocardiographic findings | Ejection fraction <50%, valvular regurgitation |
| Radiological imaging findings | Pulmonary edema††, pleural effusion††, metastatic infection††† |

†: Within 2 months before admission

††: On admission

†††: Including deep-seated abscess, pyogenic arthritis, vertebral osteomyelitis, or spinal epidural abscess

**Supplementary Table 2**: Execution rate of each examination.

|  | IE group  (N = 59) | UF group | | |
| --- | --- | --- | --- | --- |
| Total  (N = 85) | group 1†  (N = 75) | group 2††  (N = 10) |
| Blood test | 59 (100) | 85 (100) | 75 (100) | 10 (100) |
| Urinary test | 44 (75) | 72 (85) | 63 (84) | 9 (90) |
| Blood culture | 59 (100) | 78 (92) | 69 (92) | 9 (90) |
| Echocardiography | 59 (100) | 60 (71) | 52 (69) | 8 (80) |
| Transthoracic echocardiography | 59 (100) | 60 (71) | 52 (69) | 8 (80) |
| Transesophageal echocardiography | 22 (37) | 3 (4) | 4 (4) | NA |
| Cranial CT | 51 (86) | 18 (21) | 16 (21) | 2 (20) |
| Cranial MRI | 38 (64) | 13 (15) | 11 (15) | 2 (20) |
| Thoracic and abdominal CT††† | 43 (73) | 59 (69) | 51 (68) | 8 (80) |
| Thoracic CT††† | 50 (85) | 60 (71) | 52 (69) | 8 (80) |
| Abdominal CT††† | 44 (75) | 62 (73) | 54 (72) | 8 (80) |
| Spinal MRI | 9 (15) | 13 (15) | 11 (15) | 2 (20) |

All values are n (%). CT: computed tomography, MRI: magnetic resonance imaging.

†: Patients with a definitive diagnosis other than infective endocarditis or fever of unknown origin.

††: Patients with final diagnoses of fever of unknown origin, who were initially diagnosed as “deny” (6/10 patients) or “probable” (4/10 patients) by modified Duke criteria.

†††: With contrast enhancement

**Supplementary Table 3**: Breakdown of final diagnoses in undiagnosed fever group.

| ICD-10 code  (N = 85) | Disease  classification | Diagnoses |
| --- | --- | --- |
| A (N = 8)  and  B (N = 6) | Infectious and parasitic diseases | Clostridium difficile infection (4), rickettsia infection (2), viral infection (2), herpesvirus meningitis (2), bacteremia (1), ileitis (1), infectious mononucleosis (1), fungemia (1) |
| C (N = 11) | Neoplasms | Prostate cancer (2), malignant lymphoma (1), peripheral T-cell lymphoma (1), Hodgkin lymphoma (1), intravascular large B-cell lymphoma (1), diffuse large B-cell lymphoma (1), ileal gastrointestinal stromal tumor (1), peritoneal cancer (1), systemic metastasis of ovarian cancer (1), urethral cancer (1) |
| D (N = 4) | Blood, blood-forming organs, immune mechanisms | Histiocytic necrotizing lymphadenitis (2), idiopathic eosinophilic syndrome (1), sarcoidosis (1) |
| E (N = 1) | Endocrine, nutritional, and metabolic | Familial Mediterranean fever (1) |
| G (N = 4) | Nervous system | Aseptic meningitis (1), streptococcal meningitis (1), malignant syndrome (1), extradural abscess (1) |
| I (N = 2) | Circulatory system | Mesenteric lymphadenitis (1), viral pericarditis (1) |
| J (N = 7) | Respiratory system | Bacterial pneumonia (3), aspiration pneumonia (2), chronic sinusitis (1), pharyngeal tonsillitis (1) |
| K (N = 6) | Digestive system | Ulcerative colitis (1), mesenteric panniculitis (1), acute cholangitis (1), acute cholecystitis (1), non-occlusive mesenteric ischemia (1), abdominal pelvic abscess (1) |
| L (N = 1) | Skin and subcutaneous tissue | Drug rash (1) |
| M (N = 21) | Musculoskeletal system and connective tissue | Eosinophilic granulomatosis with polyangiitis (5), vertebral osteomyelitis (3), incomplete Behcet's disease (2), subacute arthritis (2), polymyalgia rheumatica (1), proliferative fasciitis (1), systemic lupus erythematosus (1), aortitis syndrome (1), polyarteritis nodosa (1), chronic disorder (1), pseudogout (1), adult-onset Still’s disease (1), pyogenic arthritis (1) |
| N (N = 3) | Genitourinary system | Acute focal bacterial nephritis (1), acute pyelonephritis (1), urinary tract infection (1) |
| Q (N = 1) | Congenital malformations, deformations, and chromosomal abnormalities | Multiple liver cysts (1) |
| R (N = 10) | Symptoms, signs, and abnormal clinical and laboratory findings, not elsewhere classified | Fever of unknown origin (10) |

**Supplementary Table 4**: Causative bacteria in the infective endocarditis group.

| Microbiologic findings | Total  (N = 59) |
| --- | --- |
| Negative blood culture | 9 (15) |
| *Staphylococcus aureus* | 18 (30) |
| Methicillin-sensitive *staphylococcus aureus* | 12 (20) |
| Methicillin-resistant *staphylococcus aureus* | 6 (10) |
| *Viridans Streptococci* | 9 (15) |
| *Enterococcus spp.* | 3 (5) |
| Polymicrobial | 4 (7) |
| Others† | 16 (27) |

All values are n (%).

†: *Staphylococcus spp.* 4 (7), *Streptococcus spp.* 6 (10), *Corynebacterium spp.* 2 (3), *Escherichia coli* 2 (3), *Lactococcus graviae* 1 (2), *Aerococcus urinae* 1 (2).

**Supplementary Appendix 1**: Formula of the prediction model and predictive probability.

Prediction model formula:

−8.350 + (transfer by ambulance = 4.087) + (cardiac murmur on admission = 2.844) + (pleural fluid = 1.440) + {neutrophil count (%) × 0.090} + {platelet count (103/µL) × (−0.057)}.

Predictive occurrence of infective endocarditis (%)

100 × exp(score) ÷ {1 + exp(score)}.
